# Supplementary material for: Continuous flow hydrothermal synthesis of phase pure rutile TiO2 nanoparticles with a rod-like morphology
Source: Royal Society of Chemistry journal article supplement (doi:10.1039/c9nr09069j), 2020-01-01
Supplement: c9nr09069j1.pdf [file c9nr09069j1.pdf]

Electronic supplementary information

## **Continuous Flow Hydrothermal Synthesis of Phase Pure Rutile TiO<sub>2</sub> Nanoparticles with a Rod-Like Morphology**

Jonas Beyer<sup>a</sup>, Frederik Søndergaard-Pedersen<sup>a</sup>, Jinlong Yu<sup>a</sup>, Aref Mamakhel<sup>a</sup>, and Bo Brummerstedt Iversen<sup>a,\*</sup>

<sup>a</sup>Center for Materials Crystallography, Department of Chemistry, Aarhus University, DK-8000 Aarhus C, Denmark.

\*Corresponding author : bo@chem.au.dk

**Fig. S1. STEM/EDS Results**

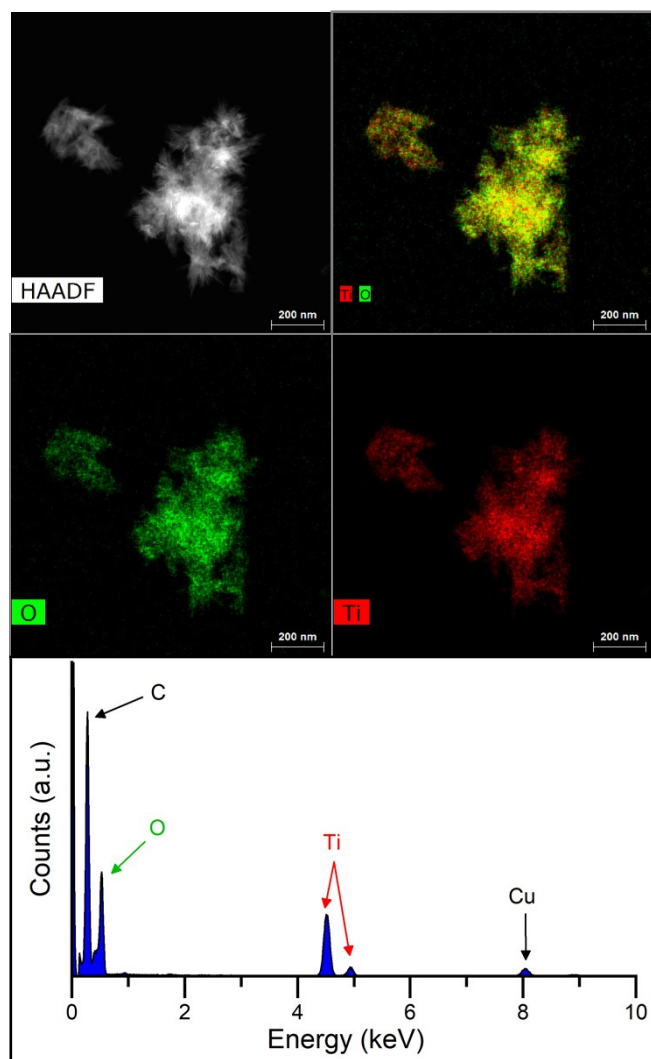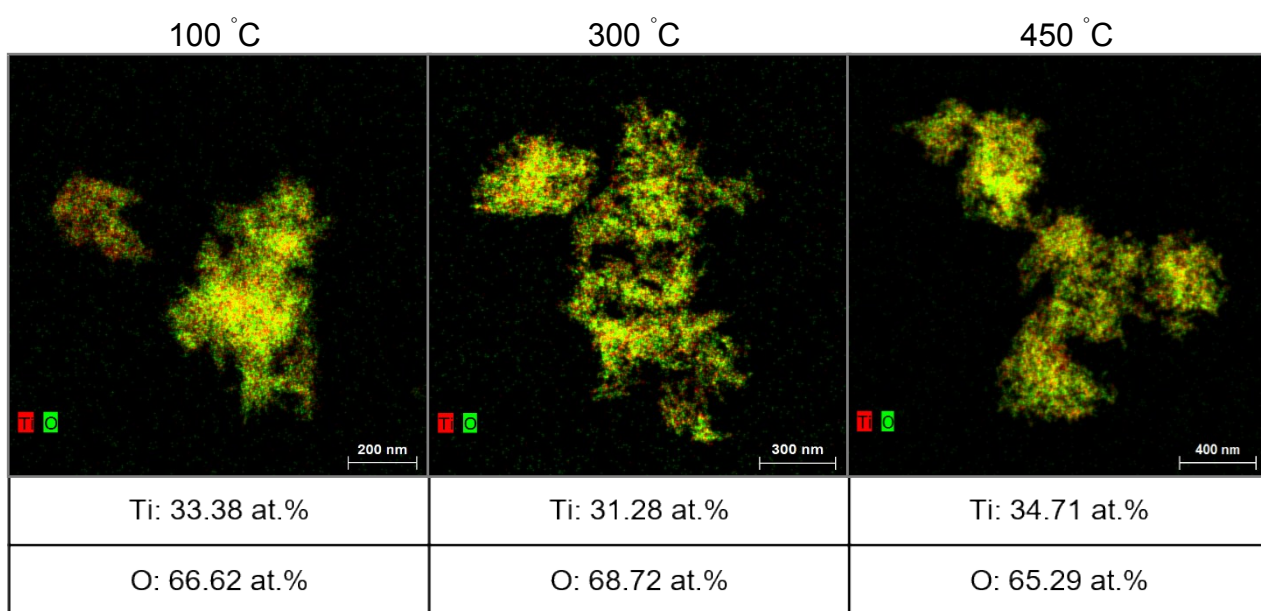

**Fig. S2**

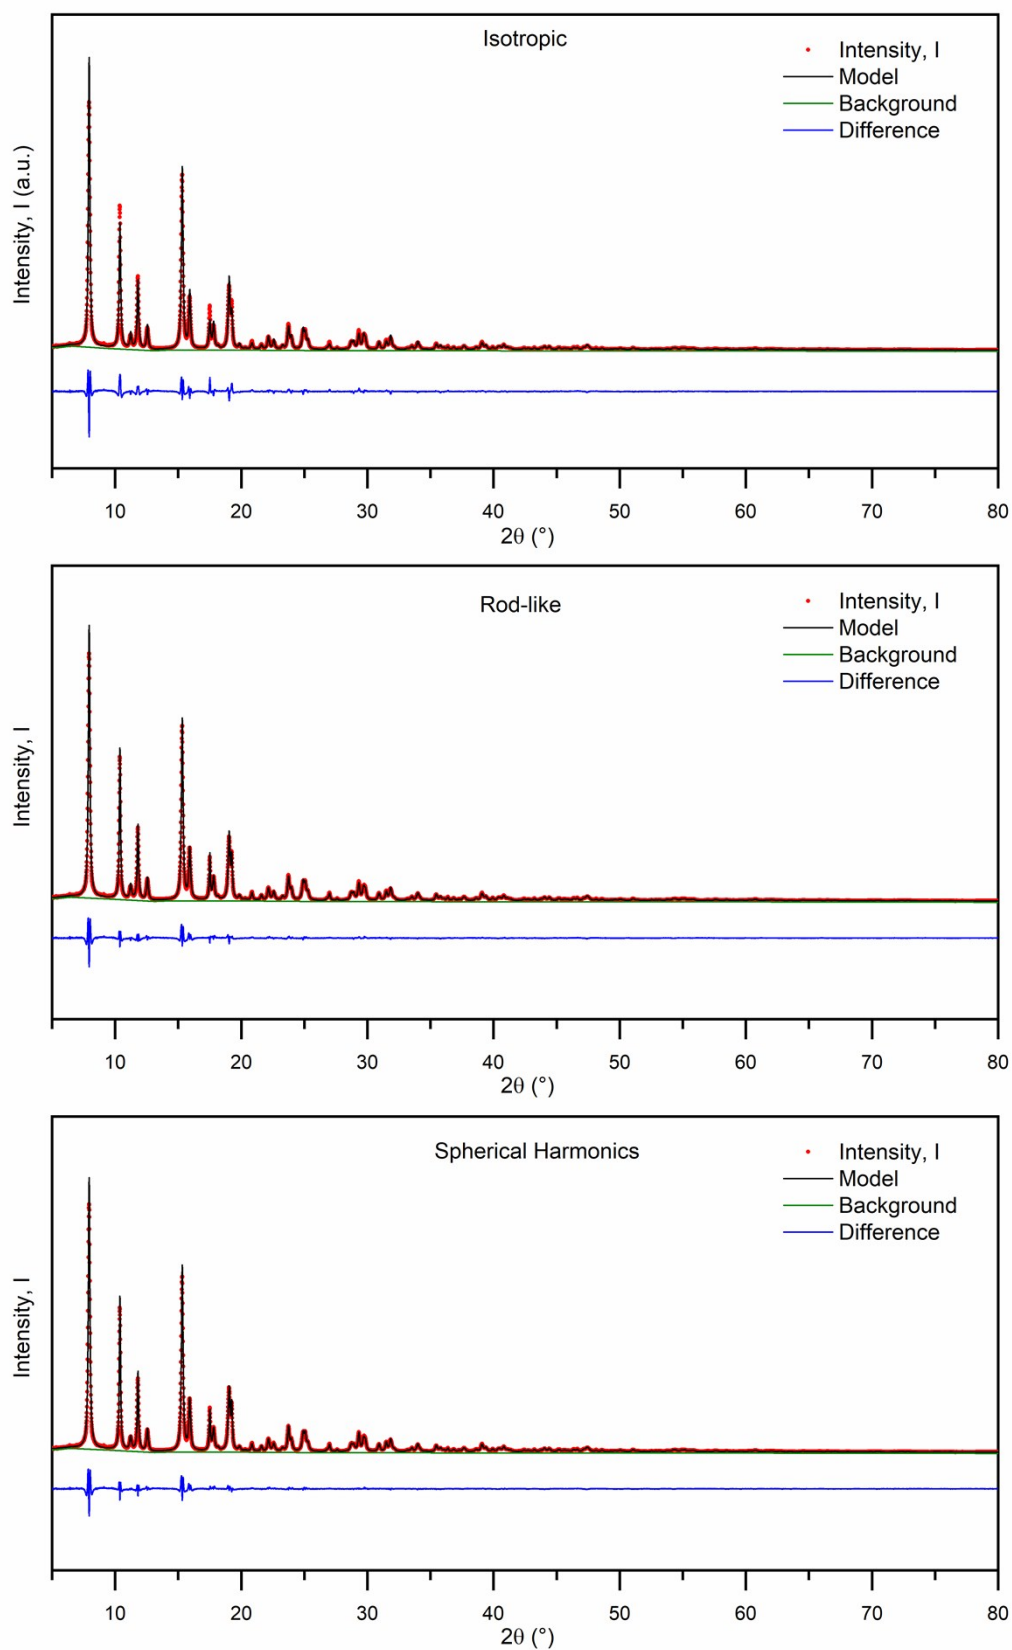

**Figure S2.** Full angular range for the Rietveld Refinements of the 300 °C sample using the (top) isotropic model, (middle) rod-like model, and (bottom) spherical harmonics model.

**Fig. S3**

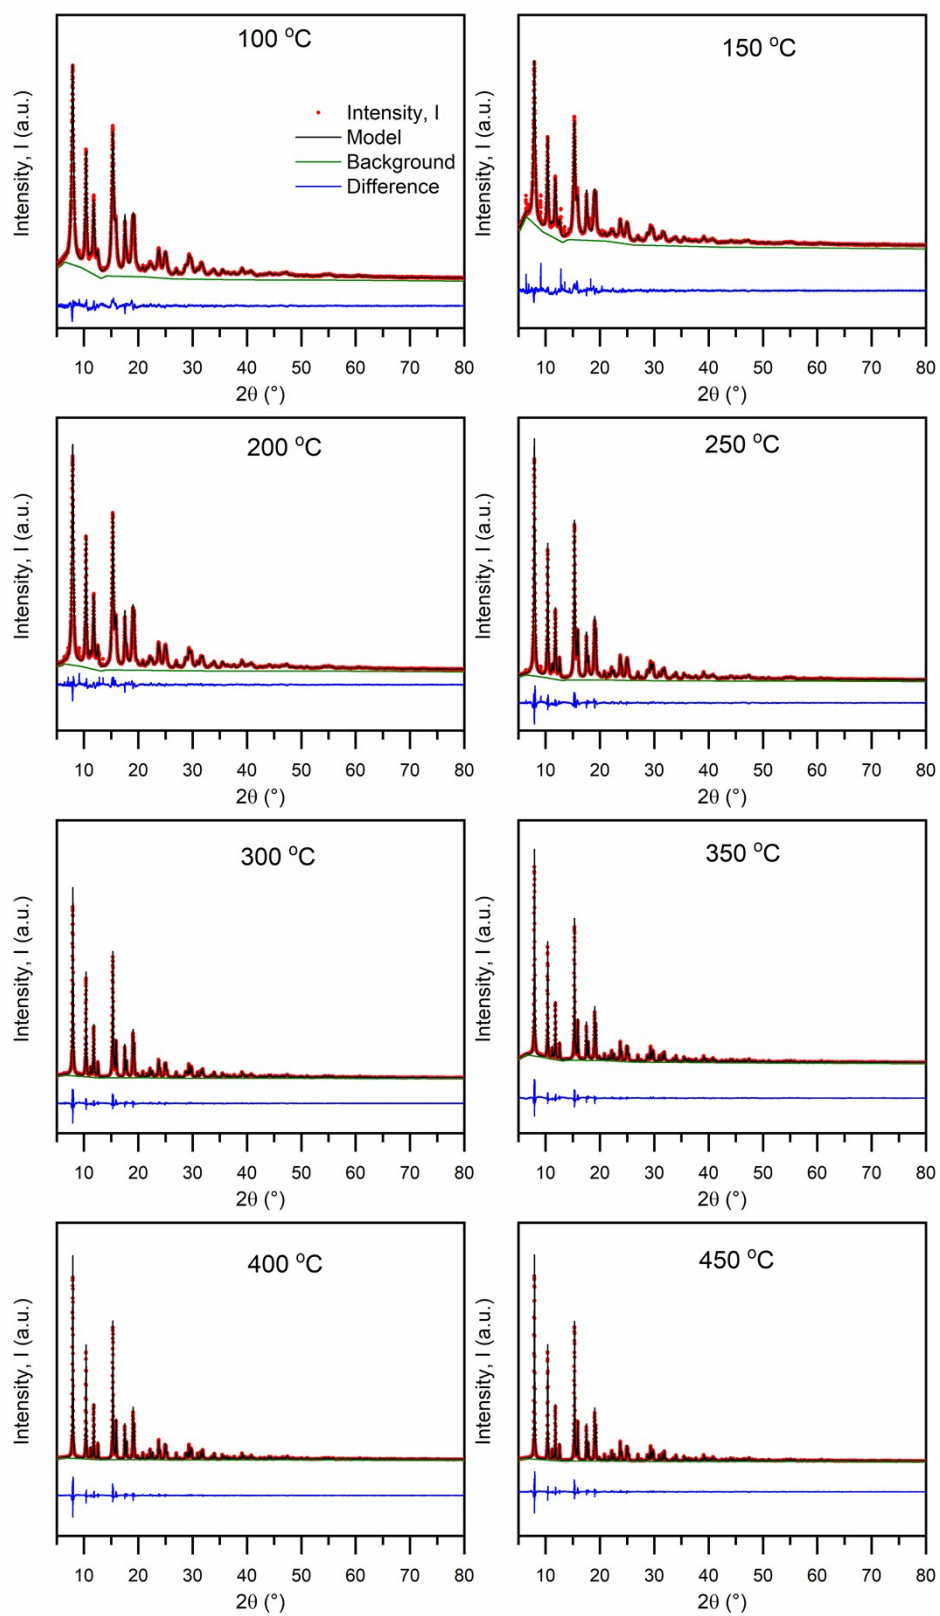

**Figure S3.** Full angular range for the Rietveld Refinements of all 8 samples using the rod-like model, i.e. model (ii).

**Fig. S4**

| Sample | $R_{\text{Bragg}}$ | $R_{\text{wp}}$ | $\chi^2$ |
|--------|--------------------|-----------------|----------|
| 100 °C | 1.7                | 7.06            | 5.95     |
| 150 °C | 2.69               | 11.4            | 10.2     |
| 200 °C | 1.71               | 7.05            | 10.2     |
| 250 °C | 1.73               | 8.27            | 12.8     |
| 300 °C | 2.01               | 9.21            | 15.7     |
| 350 °C | 3.74               | 10.7            | 19.7     |
| 400 °C | 2.28               | 9.78            | 20.7     |
| 450 °C | 2.54               | 10.2            | 16.6     |

**Figure S4** – Agreement factors  $R_{\text{wp}}$ ,  $R_{\text{Bragg}}$  and  $\chi^2$  for the Rietveld Refinements of all 8 samples using the rod-like model, i.e. model (ii).

**Fig. S5**

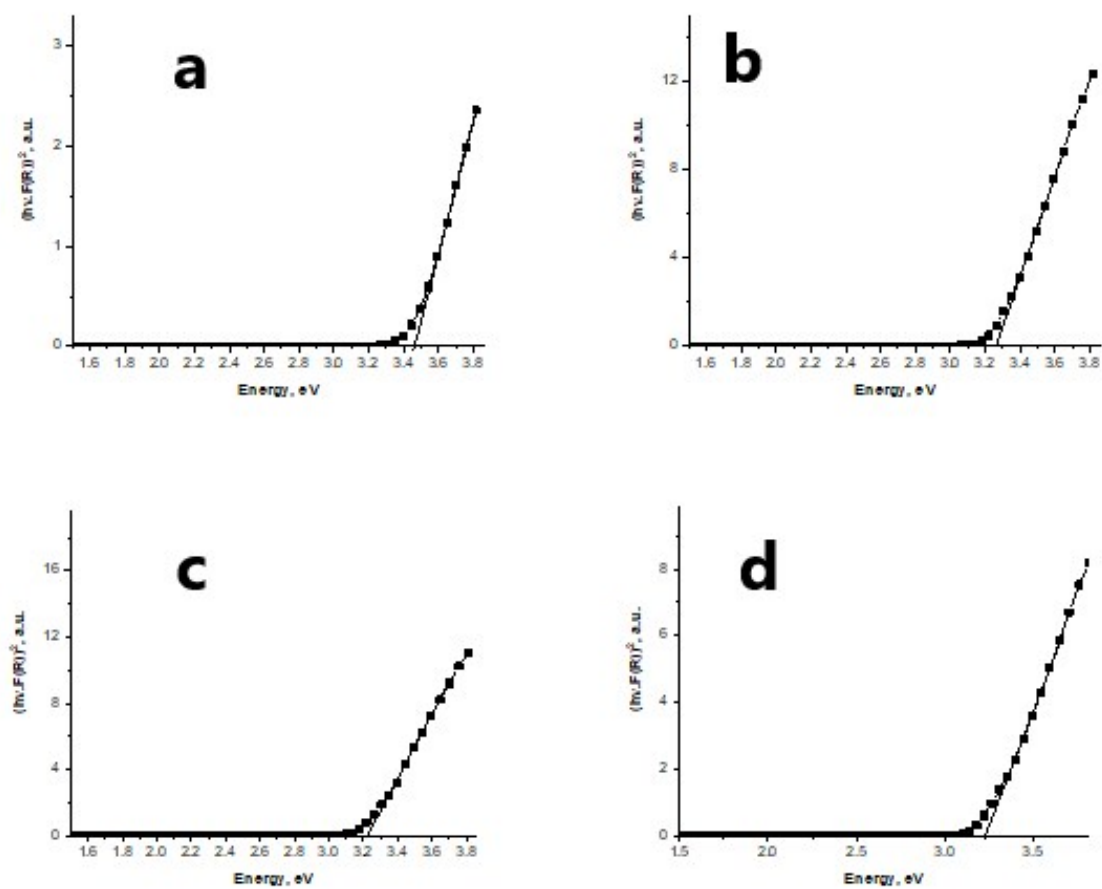

**Figure S5 I.** Tauc plots for the (a) 100 °C, (b) 150 °C, (c) 200 °C, and (d) 250 °C samples. Extracted band gap energies are reported in Table 1.

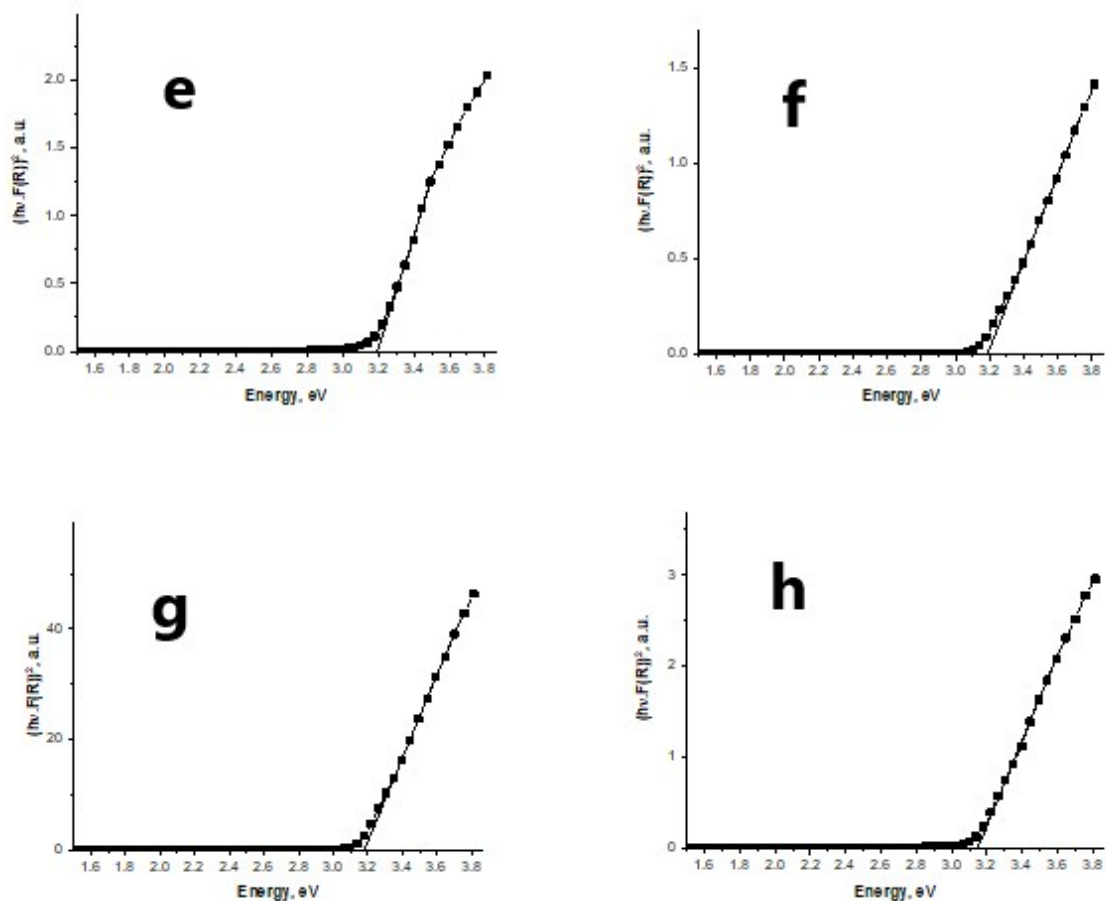

**Figure S5 II.** Tauc plots for the (e) 300 °C, (f) 350 °C, (g) 400 °C, and (h) 450 °C samples. Extracted band gap energies are reported in Table 1.

**Fig. S6**

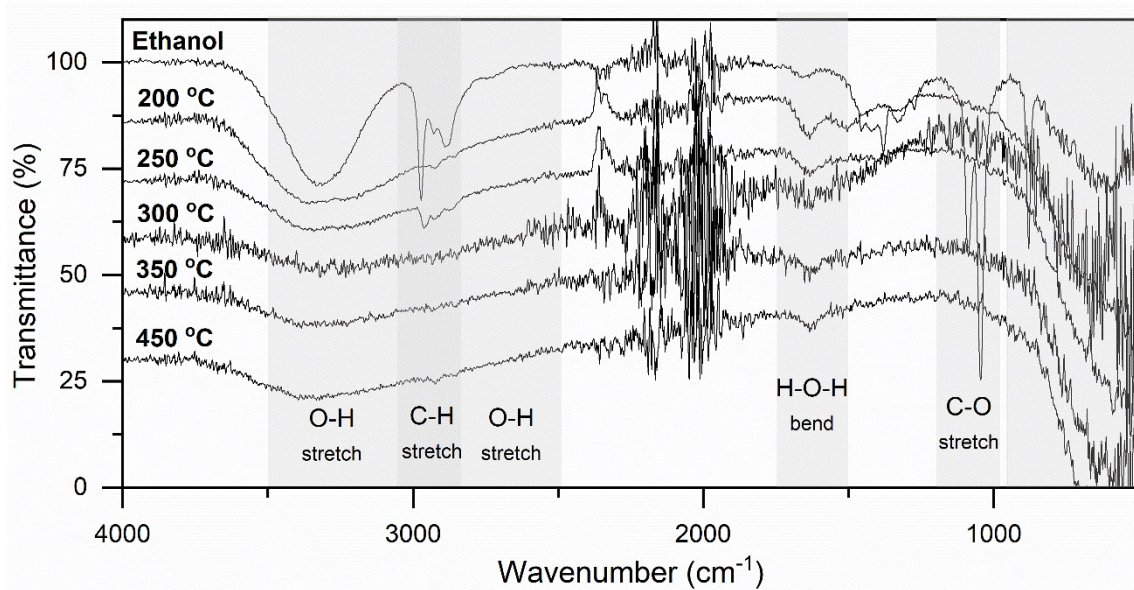

**Figure S6.** FTIR spectra of the 200 – 450 °C samples. Some weak C-H signals just below 3000  $\text{cm}^{-1}$  are seen for the 250 °C sample indicating the presence of ethanol.

**Fig. S7**

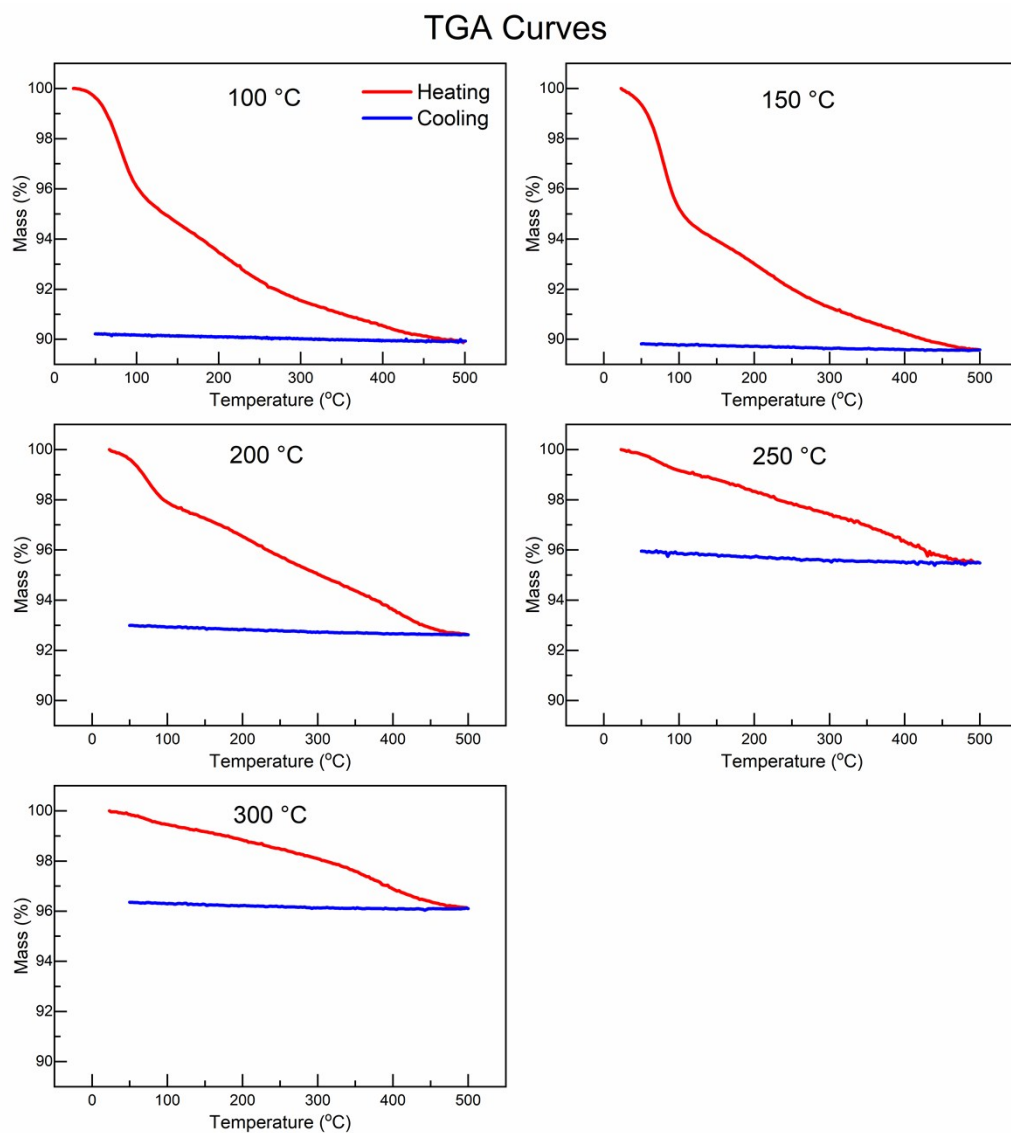

**Figure S7.** TGA curves for the 100 °C to 300 °C samples. The weight percent of lost water during heating is decreasing as a function of particle size and/or specific surface area.
